# Supplementary material for: Extracellular vesicles from young women’s breast cancer patients drive increased invasion of non-malignant cells via the Focal Adhesion Kinase pathway: a proteomic approach
Source: Springer Nature journal article supplement (doi:10.1186/s13058-020-01363-x), 2020-11-23
Supplement: MOESM1 [file 18615968]

| <b>Additional File 1: Clinical Characteristics of Enrolled Patients</b> |                 |                      |                    |                              |
|-------------------------------------------------------------------------|-----------------|----------------------|--------------------|------------------------------|
| <b>Proteomics</b>                                                       | <b>Case</b>     | <b># of Patients</b> | <b>Age (Range)</b> | <b>Stage (# of Patients)</b> |
|                                                                         | Luminal A       | 2                    | 34 (33-35)         | II (2)                       |
|                                                                         | Luminal B       | 14                   | 34 (27-40)         | II(9), III(3), IV(2)         |
|                                                                         | Triple Negative | 4                    | 36 (29-40)         | I(2), II(2)                  |
|                                                                         | Healthy Donor   | 10                   | 28 (23-48)         | n/a                          |
| <b>Invasion Assays</b>                                                  | <b>Case</b>     | <b># of Patients</b> | <b>Age (Range)</b> | <b>Stage (# of Patients)</b> |
|                                                                         | Luminal A       | 2                    | 34 (33-35)         | II (2)                       |
|                                                                         | Luminal B       | 11                   | 34 (27-40)         | II(6), III(3), IV(2)         |
|                                                                         | Triple Negative | 4                    | 36 (29-40)         | I(2), II(2)                  |
|                                                                         | Healthy Donor   | 10                   | 28 (23-48)         | n/a                          |
